# Supplementary material
Source: PubMed Central journal article supplement (PMC4517579)
Supplement: NIHMS708358-supplement-Supplementary_Figures.pdf [file NIHMS708358-supplement-Supplementary_Figures.pdf]

## SUPPLEMENTARY INFORMATION

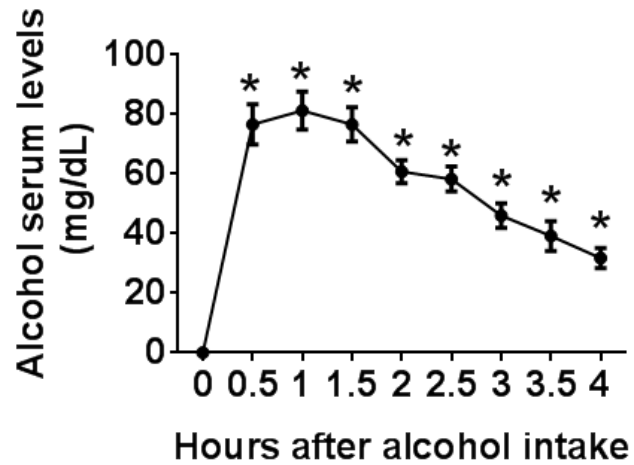

**Figure S1. Induction of blood alcohol content after acute binge drinking in healthy human subjects.** Normal, nonalcoholic individuals received acute alcohol binge (2ml vodka/kg body weight). Blood samples were taken at different time points as mentioned in the bar graph. Alcohol content in the blood was analyzed by Analox Alcohol Analyzer. The data are presented as Mean $\pm$ SEM (n=17 individuals). \* $p < 0.05$ , \*represents comparison between baseline and treatment groups.

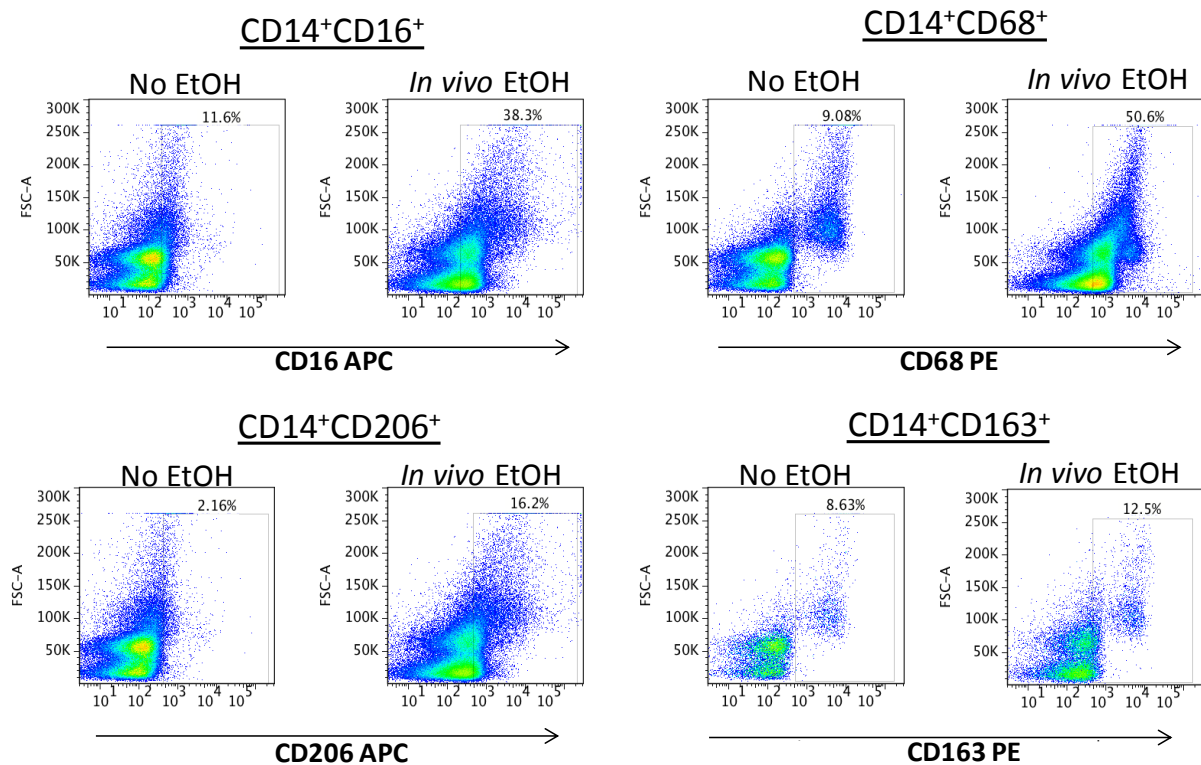

**Figure S2. Increased expression of macrophage markers in circulating CD14<sup>+</sup> monocytes in acute binge drinking subjects.** PBMCs were isolated and immunophenotyped by flow cytometry. Frequency of CD14<sup>+</sup> cells expressing CD16, CD68, CD206 and CD163 are shown as representative dot plots for control (No EtOH) and *in vivo* EtOH group.

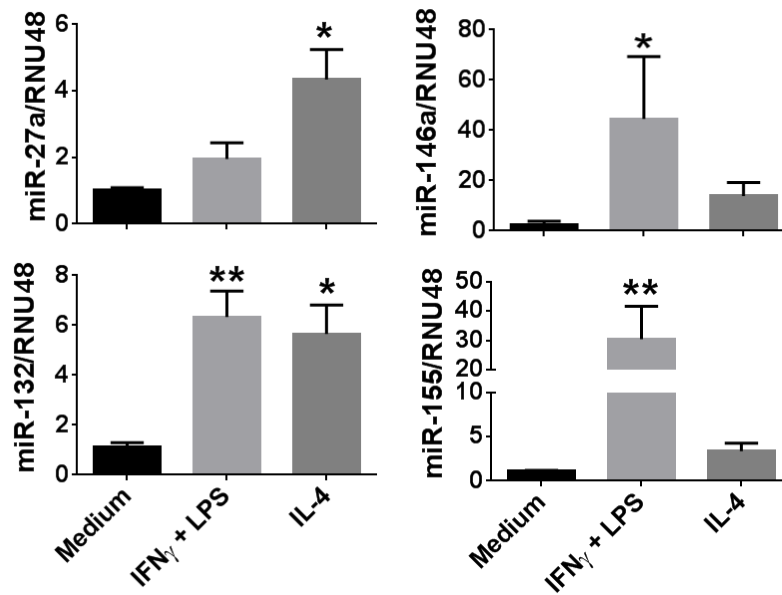

**Figure S3. Expression levels of miRs with M1- and M2-macrophage polarizing agents.**

Monocytes isolated from healthy individuals were cultured in the presence of M-CSF for 5 days and then treated with IFN $\gamma$  plus LPS or IL-4 or were left untreated for another 18 hr. The cells were harvested and the expression of miR-27a, miR-146a, miR-132 and miR-155 was assayed by qRT-PCR, and data were normalized to RNU48 control. The fold increase in the expression of these miRNAs versus non-stimulated cells is shown. Data represented as Mean $\pm$ SEM, n=4, \*p<0.05.

Figure S3

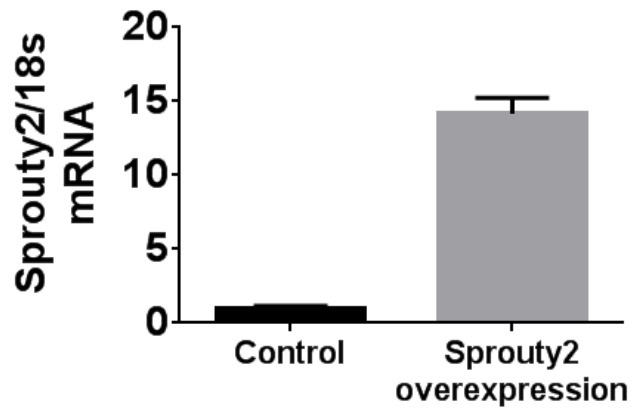

**Figure S4. Overexpression of sprouty2 in the normal human monocytes.** Healthy monocytes were transfected with PCMV-sprouty2 construct, cells were harvested after 48 hr and the level of sprouty2 gene expression was evaluated.

Figure S4
